# Supplementary material for: Low-count whole-body PET with deep learning in a multicenter and externally validated study
Source: PubMed Central journal article supplement (PMC8382711; doi:10.1038/s41746-021-00497-2), 2021-08-23
Supplement: 41746_2021_497_MOESM1_ESM.pdf [file 41746_2021_497_MOESM1_ESM.pdf]

- 1 **Supplementary Table 1:** Confusion matrices for the diagnostic image quality (DIQ) scoring for
- 2 the three readers.

| <b>Reader 1</b> |              | <b>Low-count-enhanced</b> |          |          |          |
|-----------------|--------------|---------------------------|----------|----------|----------|
| <b>Standard</b> | <b>Score</b> | <b>2</b>                  | <b>3</b> | <b>4</b> | <b>5</b> |
|                 | <b>2</b>     | 0                         | 0        | 0        | 0        |
|                 | <b>3</b>     | 1                         | 10       | 2        | 1        |
|                 | <b>4</b>     | 1                         | 8        | 7        | 1        |
|                 | <b>5</b>     | 0                         | 3        | 9        | 7        |
| <b>Reader 2</b> |              | <b>Low-count-enhanced</b> |          |          |          |
| <b>Standard</b> | <b>Score</b> | <b>2</b>                  | <b>3</b> | <b>4</b> | <b>5</b> |
|                 | <b>2</b>     | 0                         | 0        | 0        | 0        |
|                 | <b>3</b>     | 0                         | 10       | 4        | 0        |
|                 | <b>4</b>     | 4                         | 7        | 14       | 0        |
|                 | <b>5</b>     | 0                         | 1        | 6        | 4        |
| <b>Reader 3</b> |              | <b>Low-count-enhanced</b> |          |          |          |
| <b>Standard</b> | <b>Score</b> | <b>2</b>                  | <b>3</b> | <b>4</b> | <b>5</b> |
|                 | <b>2</b>     | 0                         | 0        | 0        | 0        |
|                 | <b>3</b>     | 1                         | 1        | 1        | 0        |
|                 | <b>4</b>     | 0                         | 8        | 27       | 0        |
|                 | <b>5</b>     | 0                         | 0        | 9        | 3        |

3

- 1 **Supplementary Table 2:** Confusion matrices for the overall diagnostic confidence (ODC) scoring
- 2 for the three readers.

| <b>Reader 1</b> |              | <b>Low-count-enhanced</b> |          |          |          |
|-----------------|--------------|---------------------------|----------|----------|----------|
| <b>Standard</b> | <b>Score</b> | <b>2</b>                  | <b>3</b> | <b>4</b> | <b>5</b> |
|                 | <b>2</b>     | 0                         | 0        | 0        | 0        |
|                 | <b>3</b>     | 1                         | 2        | 2        | 0        |
|                 | <b>4</b>     | 0                         | 12       | 11       | 2        |
|                 | <b>5</b>     | 0                         | 1        | 10       | 9        |
| <b>Reader 2</b> |              | <b>Low-count-enhanced</b> |          |          |          |
| <b>Standard</b> | <b>Score</b> | <b>2</b>                  | <b>3</b> | <b>4</b> | <b>5</b> |
|                 | <b>2</b>     | 0                         | 1        | 0        | 0        |
|                 | <b>3</b>     | 0                         | 0        | 1        | 0        |
|                 | <b>4</b>     | 0                         | 7        | 23       | 3        |
|                 | <b>5</b>     | 0                         | 2        | 6        | 7        |
| <b>Reader 3</b> |              | <b>Low-count-enhanced</b> |          |          |          |
| <b>Standard</b> | <b>Score</b> | <b>2</b>                  | <b>3</b> | <b>4</b> | <b>5</b> |
|                 | <b>2</b>     | 0                         | 0        | 0        | 0        |
|                 | <b>3</b>     | 0                         | 0        | 0        | 0        |
|                 | <b>4</b>     | 1                         | 0        | 1        | 5        |
|                 | <b>5</b>     | 0                         | 1        | 5        | 37       |

3

- 1 **Supplementary Table 3:** Intra-reader variation between reads 1 and 2 for DIQ and ODC as a
- 2 function of different readers. Abbreviations: Po. = Pooled across readers.

**Diagnostic Image Quality**

**Overall Diagnostic Confidence**

| <b>R1</b>      | <b>Read #1</b> |          |          |          |          |
|----------------|----------------|----------|----------|----------|----------|
| <b>Read #2</b> |                | <b>2</b> | <b>3</b> | <b>4</b> | <b>5</b> |
|                | <b>2</b>       | 0        | 0        | 0        | 0        |
|                | <b>3</b>       | 0        | 4        | 6        | 0        |
|                | <b>4</b>       | 0        | 3        | 2        | 2        |
|                | <b>5</b>       | 0        | 1        | 1        | 1        |

| <b>R1</b>      | <b>Read #1</b> |          |          |          |          |
|----------------|----------------|----------|----------|----------|----------|
| <b>Read #2</b> |                | <b>2</b> | <b>3</b> | <b>4</b> | <b>5</b> |
|                | <b>2</b>       | 0        | 0        | 0        | 0        |
|                | <b>3</b>       | 0        | 1        | 3        | 1        |
|                | <b>4</b>       | 0        | 0        | 9        | 2        |
|                | <b>5</b>       | 0        | 2        | 1        | 1        |

| <b>R2</b>      | <b>Read #1</b> |          |          |          |          |
|----------------|----------------|----------|----------|----------|----------|
| <b>Read #2</b> |                | <b>2</b> | <b>3</b> | <b>4</b> | <b>5</b> |
|                | <b>2</b>       | 0        | 0        | 0        | 0        |
|                | <b>3</b>       | 0        | 2        | 1        | 0        |
|                | <b>4</b>       | 0        | 7        | 3        | 4        |
|                | <b>5</b>       | 1        | 1        | 1        | 0        |

| <b>R2</b>      | <b>Read #1</b> |          |          |          |          |
|----------------|----------------|----------|----------|----------|----------|
| <b>Read #2</b> |                | <b>2</b> | <b>3</b> | <b>4</b> | <b>5</b> |
|                | <b>2</b>       | 0        | 0        | 0        | 0        |
|                | <b>3</b>       | 0        | 0        | 1        | 0        |
|                | <b>4</b>       | 0        | 3        | 9        | 1        |
|                | <b>5</b>       | 0        | 1        | 4        | 1        |

| <b>R3</b>      | <b>Read #1</b> |          |          |          |          |
|----------------|----------------|----------|----------|----------|----------|
| <b>Read #2</b> |                | <b>2</b> | <b>3</b> | <b>4</b> | <b>5</b> |
|                | <b>2</b>       | 0        | 0        | 0        | 0        |
|                | <b>3</b>       | 0        | 0        | 1        | 0        |
|                | <b>4</b>       | 0        | 6        | 10       | 0        |
|                | <b>5</b>       | 0        | 2        | 0        | 1        |

| <b>R3</b>      | <b>Read #1</b> |          |          |          |          |
|----------------|----------------|----------|----------|----------|----------|
| <b>Read #2</b> |                | <b>2</b> | <b>3</b> | <b>4</b> | <b>5</b> |
|                | <b>2</b>       | 0        | 0        | 0        | 0        |
|                | <b>3</b>       | 0        | 0        | 0        | 0        |
|                | <b>4</b>       | 0        | 0        | 0        | 3        |
|                | <b>5</b>       | 0        | 0        | 1        | 16       |

| Po.     | Read #1 |   |    |    |   |
|---------|---------|---|----|----|---|
| Read #2 |         | 2 | 3  | 4  | 5 |
|         | 2       | 0 | 0  | 0  | 0 |
|         | 3       | 0 | 6  | 8  | 0 |
|         | 4       | 0 | 16 | 15 | 6 |
|         | 5       | 1 | 4  | 2  | 2 |

| Po.     | Read #1 |   |   |    |    |
|---------|---------|---|---|----|----|
| Read #2 |         | 2 | 3 | 4  | 5  |
|         | 2       | 0 | 0 | 0  | 0  |
|         | 3       | 0 | 1 | 4  | 1  |
|         | 4       | 0 | 3 | 18 | 6  |
|         | 5       | 0 | 3 | 6  | 18 |

1

- 1 **Supplementary Table 5:** Intra-reader variation between reads 1 and 2 for DIQ and ODC as a
- 2 function of different institutions (institution A (IA), institution B (IB), and institution C (IC)).
- 3 Abbreviations: Po. = Pooled across institutions.

| Diagnostic Image Quality |          |                |          |          |          | Overall Diagnostic Confidence |          |                |          |          |  |
|--------------------------|----------|----------------|----------|----------|----------|-------------------------------|----------|----------------|----------|----------|--|
| <b>IA</b>                |          |                |          |          |          | <b>IA</b>                     |          |                |          |          |  |
|                          |          | <b>Read #1</b> |          |          |          |                               |          | <b>Read #1</b> |          |          |  |
| <b>Read #2</b>           |          | <b>2</b>       | <b>3</b> | <b>4</b> | <b>5</b> |                               | <b>2</b> | <b>3</b>       | <b>4</b> | <b>5</b> |  |
|                          | <b>2</b> | 0              | 0        | 0        | 0        | <b>2</b>                      | 0        | 0              | 0        | 0        |  |
|                          | <b>3</b> | 0              | 2        | 1        | 0        | <b>3</b>                      | 0        | 0              | 0        | 0        |  |
|                          | <b>4</b> | 0              | 6        | 6        | 1        | <b>4</b>                      | 0        | 1              | 7        | 3        |  |
|                          | <b>5</b> | 0              | 0        | 1        | 1        | <b>5</b>                      | 0        | 1              | 1        | 5        |  |
| <b>IB</b>                |          |                |          |          |          | <b>IB</b>                     |          |                |          |          |  |
|                          |          | <b>Read #1</b> |          |          |          |                               |          | <b>Read #1</b> |          |          |  |
| <b>Read #2</b>           |          | <b>2</b>       | <b>3</b> | <b>4</b> | <b>5</b> |                               | <b>2</b> | <b>3</b>       | <b>4</b> | <b>5</b> |  |
|                          | <b>2</b> | 0              | 0        | 0        | 0        | <b>2</b>                      | 0        | 0              | 0        | 0        |  |
|                          | <b>3</b> | 0              | 1        | 2        | 0        | <b>3</b>                      | 0        | 1              | 0        | 1        |  |
|                          | <b>4</b> | 0              | 5        | 5        | 3        | <b>4</b>                      | 0        | 0              | 5        | 2        |  |
|                          | <b>5</b> | 0              | 2        | 0        | 0        | <b>5</b>                      | 0        | 0              | 3        | 6        |  |
| <b>IC</b>                |          |                |          |          |          | <b>IC</b>                     |          |                |          |          |  |
|                          |          | <b>Read #1</b> |          |          |          |                               |          | <b>Read #1</b> |          |          |  |
| <b>Read #2</b>           |          | <b>2</b>       | <b>3</b> | <b>4</b> | <b>5</b> |                               | <b>2</b> | <b>3</b>       | <b>4</b> | <b>5</b> |  |
|                          | <b>2</b> | 0              | 0        | 0        | 0        | <b>2</b>                      | 0        | 0              | 0        | 0        |  |
|                          | <b>3</b> | 0              | 3        | 5        | 0        | <b>3</b>                      | 0        | 0              | 4        | 0        |  |
|                          | <b>4</b> | 0              | 5        | 4        | 2        | <b>4</b>                      | 0        | 2              | 6        | 1        |  |
|                          | <b>5</b> | 1              | 2        | 1        | 1        | <b>5</b>                      | 0        | 2              | 2        | 7        |  |

| <b>Po.</b>     | <b>Read #1</b> |          |          |          |          |
|----------------|----------------|----------|----------|----------|----------|
| <b>Read #2</b> |                | <b>2</b> | <b>3</b> | <b>4</b> | <b>5</b> |
|                | <b>2</b>       | 0        | 0        | 0        | 0        |
|                | <b>3</b>       | 0        | 6        | 8        | 0        |
|                | <b>4</b>       | 0        | 16       | 15       | 6        |
|                | <b>5</b>       | 1        | 4        | 2        | 2        |

| <b>Po.</b>     | <b>Read #1</b> |          |          |          |          |
|----------------|----------------|----------|----------|----------|----------|
| <b>Read #2</b> |                | <b>2</b> | <b>3</b> | <b>4</b> | <b>5</b> |
|                | <b>2</b>       | 0        | 0        | 0        | 0        |
|                | <b>3</b>       | 0        | 1        | 4        | 1        |
|                | <b>4</b>       | 0        | 3        | 18       | 6        |
|                | <b>5</b>       | 0        | 3        | 6        | 18       |

1

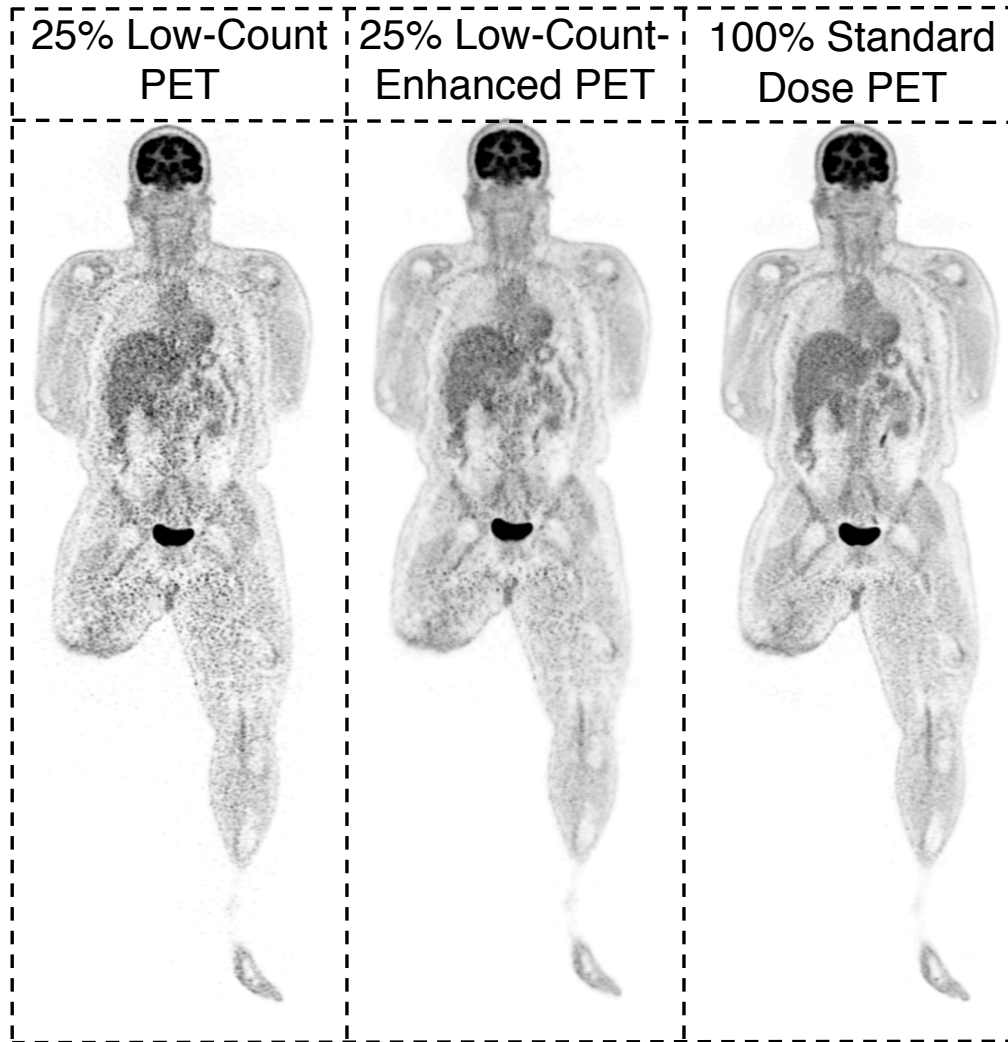

1  
2 **Supplementary Figure 1:** Example 25% low-count images, 25% low-count-enhanced images,  
3 and the corresponding standard images for a 34-year old male with BMI of 28 scanned on a GE  
4 Discovery MI PET scanner. The subject had a right lower extremity stump and was an out-of-  
5 distribution input for the training corpus. Despite this, the low-count-enhancement algorithm  
6 successfully improved image quality of the low-count image without generating artifacts.

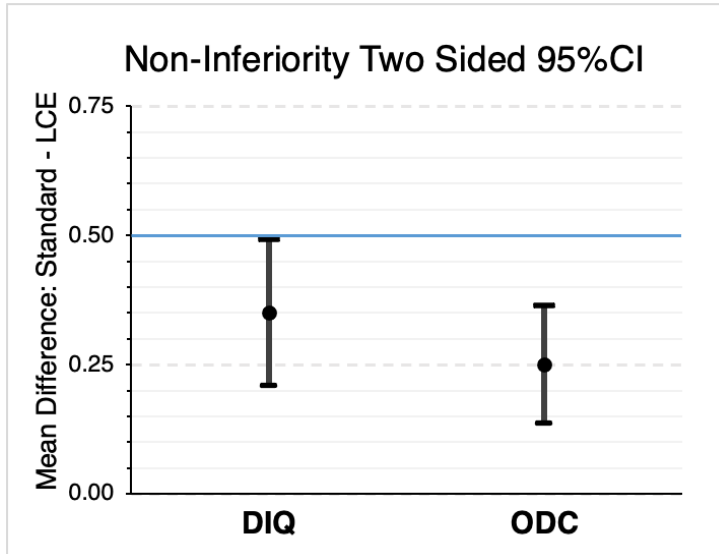

1  
2 **Supplementary Figure 2:** Point estimates and corresponding 95% confidence intervals for  
3 demonstrating the non-inferiority of the low-count-enhancement (LCE) method for diagnostic  
4 image quality (DIQ) and overall diagnostic confidence (ODC) ratings for a threshold of 0.5 points  
5 (blue line) on the Likert scale.



1

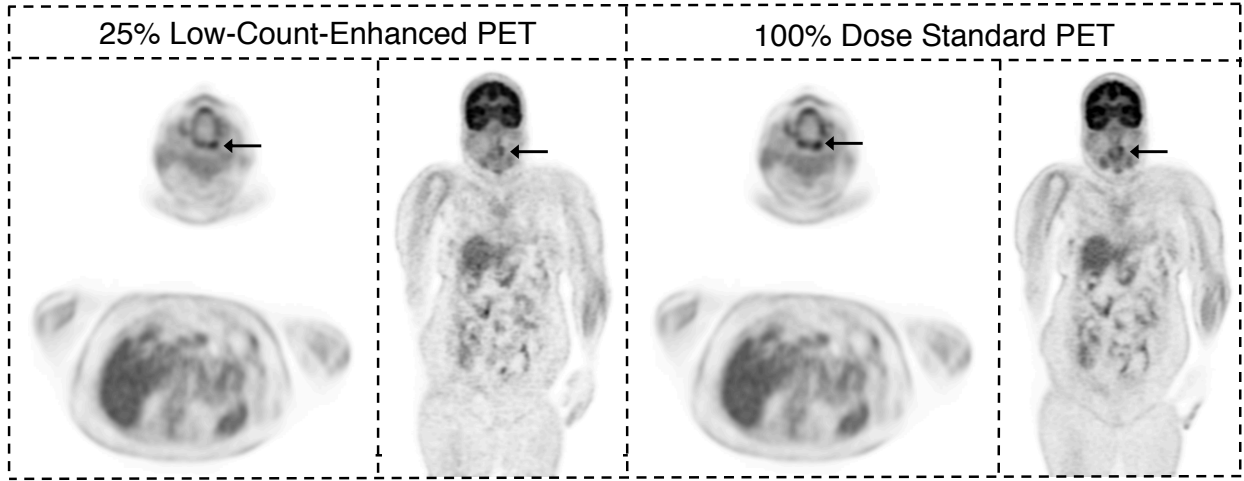

2

3 **Supplementary Figure 3:** Example 25% low-count-enhanced images and the corresponding  
4 standard images for a 31-year old female with BMI of 18 scanned on a Siemens Biograph64  
5 TruePoint PET scanner. Axial slices through the neck and liver are seen, along with a coronal  
6 reformat. Increased metabolic activity is seen in the left tonsil (arrow). Despite the similar image  
7 quality, three different readers provided diagnostic image quality scores of 3, 4, and 5 for this  
8 patient's low-count-enhanced scan.

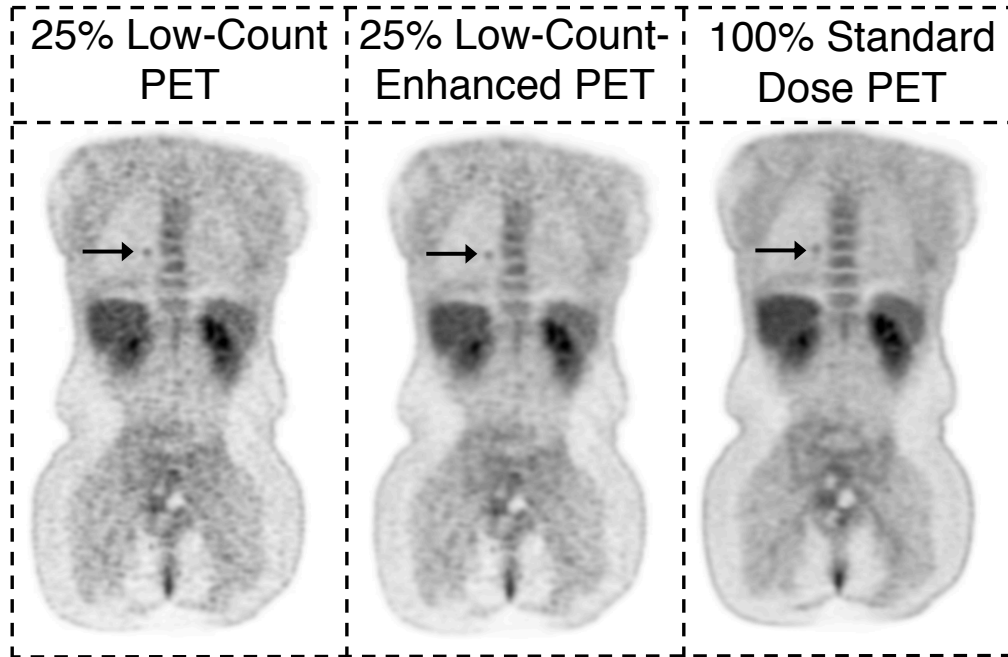

1

2 **Supplementary Figure 4:** Example 25% low-count images, 25% low-count-enhanced images,  
3 and the corresponding standard images for a 44-year old female with BMI of 20 scanned on a  
4 Siemens Biograph64 TruePoint PET scanner. A lung nodule is visible in the right lobe of the lung  
5 (arrow). Reader 1 rated the low-count-enhanced image with a DIQ of 5, while the standard-dose  
6 image was rated with a 3. Readers 2 and 3 rated both images with scores of 3 and 4, respectively.

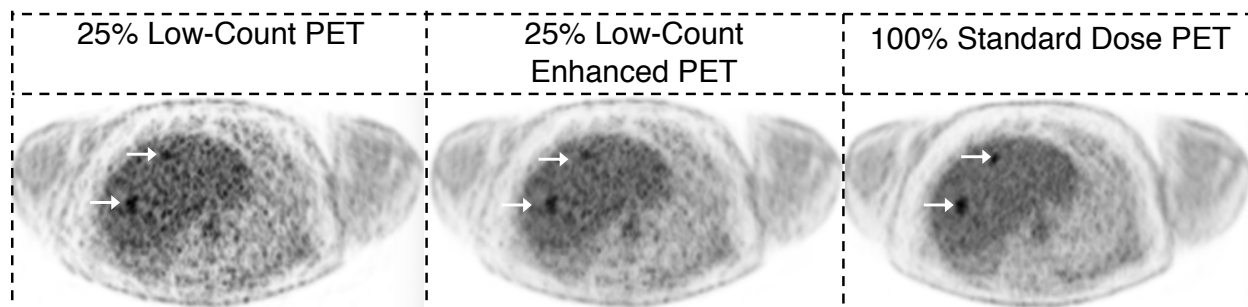

1  
2 **Supplementary Figure 5:** Example 25% low-count images, 25% low-count-enhanced images,  
3 and the corresponding standard images for a 64-year old female with BMI of 24 scanned on a GE  
4 Discovery MI PET scanner. Two subtle lesions (arrows) are depicted in the liver with low lesion  
5 conspicuity due to the high background noise in the liver in the low-count image. Despite starting  
6 from a noisy image, the model was able to denoise the low-count-enhanced image without  
7 suppressing lesion conspicuity. Overall, both the low-count-enhanced and the standard dose  
8 images show improved conspicuity for the depiction of the same lesions.
